# Supplementary material for: Los recursos didácticos para la formación de expertos: el texto, el medio maestro y su estructura
Source: Royal Society of Chemistry journal article supplement (doi:10.1039/c4cp05065g), 1994-01-01
Supplement: c4cp05065g1.pdf [file c4cp05065g1.pdf]

## Supplementary Information

for

## Synergistic Effects of Nonmetals Co-doping with Sulfur in Anatase TiO<sub>2</sub>: A

### DFT+U Study

Qing-Lu Liu<sup>1,3</sup>, Zong-Yan Zhao<sup>2,\*</sup>, Qing-Ju Liu<sup>3,\*</sup>

<sup>1</sup> School of Physical Science and Technology, Yunnan University, Kunming 650091, People's Republic of China

<sup>2</sup> Faculty of Materials Science and Engineering, Key Laboratory of Advanced Materials of Yunnan Province, Kunming University of Science and Technology, Kunming 650093, People's Republic of China

<sup>3</sup> Yunnan Key Laboratory of Micro/Nano Materials & Technology, Research Institute of Engineering and Technology, Yunnan University, Kunming 650091, People's Republic of China

\* Corresponding authors: zzy@kmust.edu.cn (Z. Zhao); qjliu@ynu.edu.cn (Q. Liu)

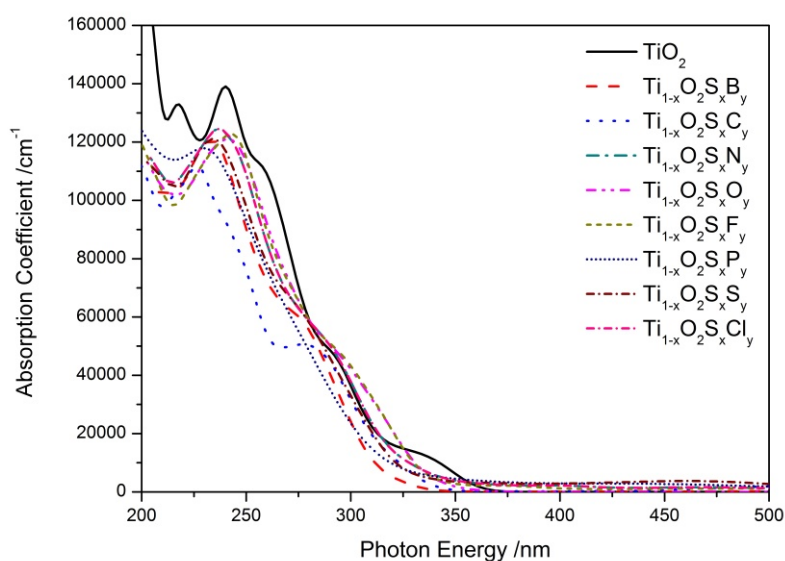

Fig. S1 Calculated absorption curves of pure TiO<sub>2</sub> and Ti<sub>1-x</sub>O<sub>2</sub>S<sub>x</sub>NM<sub>y</sub> (NM=B, C, N, O, F, P, S and Cl).

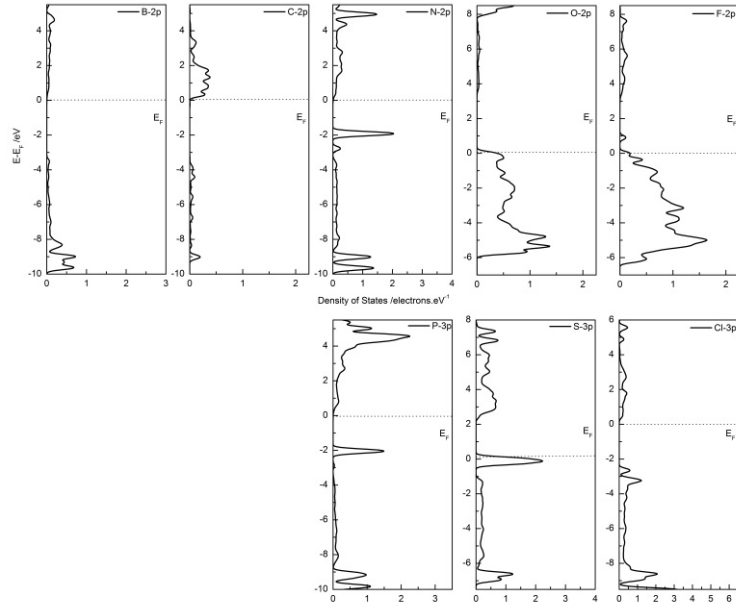

Fig. S2 Calculated partial density of states of NM- $np$  states in  $Ti_{1-x}O_2S_xNM_y$  (NM=B, C, N, O, F, P, S and Cl).

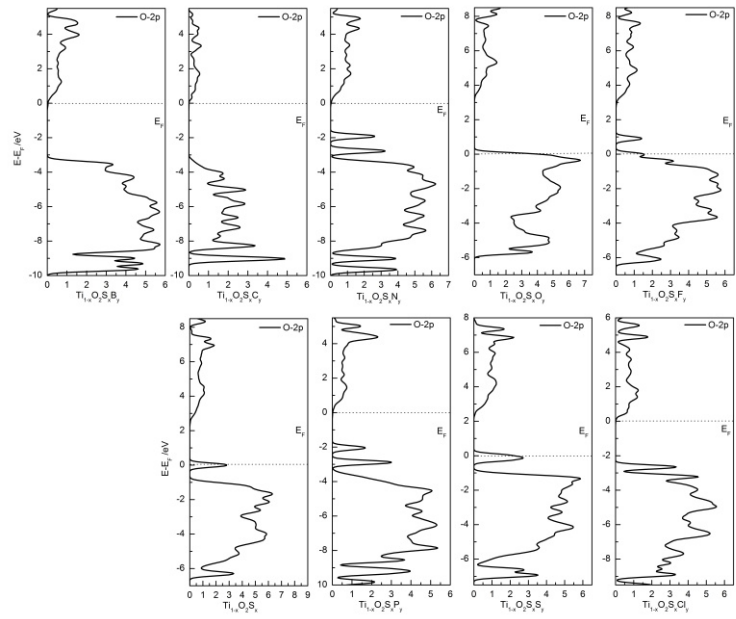

Fig. S3 Calculated partial density of states of O- $2p$  states neighboring with  $S_s$  impurity in  $Ti_{1-x}O_2S_xNM_y$  (NM=B, C, N, O, F, P, S and Cl).

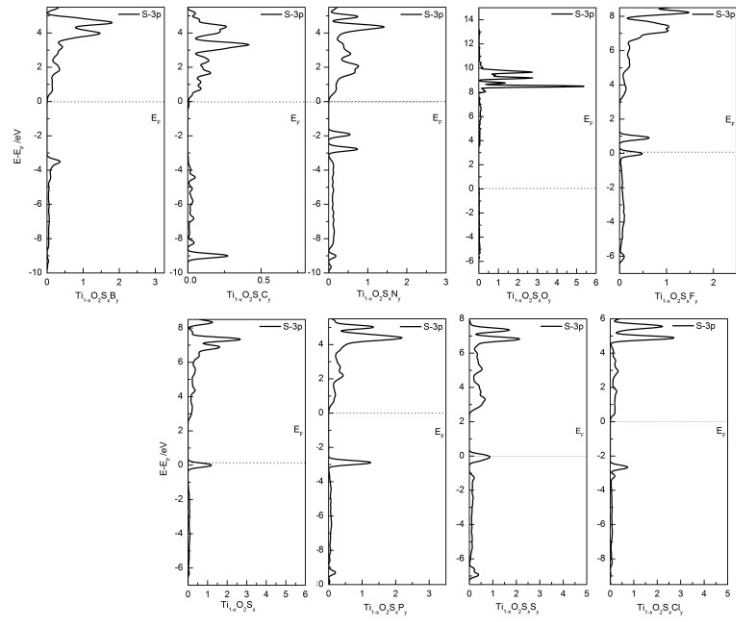

Fig. S4 Calculated partial density of states of  $S_s$ -3p states in  $Ti_{1-x}O_2S_xNM_y$  (NM=B, C, N, O, F, P, S and Cl).
